# Supplementary material for: Fracture Healing in Elderly Mice and the Effect of an Additional Severe Blood Loss: A Radiographic and Biomechanical Murine Study
Source: MDPI journal article supplement (doi:10.3390/bioengineering10010070), 2023-01-05
Supplement: s1 [file s1]

**Supplementary Table S1.** Activity score. The activity of the animals was regularly monitored by assessing the behavior and general condition using an activity score.

| <b>Activity Score</b> | <b>Quality</b> | <b>Behaviour</b>                                                                                    | <b>General Condition</b>                                                   |
|-----------------------|----------------|-----------------------------------------------------------------------------------------------------|----------------------------------------------------------------------------|
| 1                     | very active    | lively, attentive, curious, species-typical movements                                               | fur smooth, shiny; eyes clear, shiny; orifices clean                       |
| 2                     | active         | attentive, species-typical movements                                                                | fur smooth, shiny; eyes clear, shiny; orifices clean                       |
| 3                     | reduced active | attentive, calm, reduced movement, species-typical posture                                          | fur smooth, shiny; eyes clear, shiny; orifices clean                       |
| 4                     | quiet          | animal calm, frequent pausing, limited reactions to environmental stimuli, reduced personal hygiene | fur dull, possibly erect; eyes no longer fully open                        |
| 5                     | lethargic      | self-isolation; no significant activity                                                             | fur erect; eyes closed; orifices sticky or damp; hunched posture           |
| 6                     | moribund       | no activity, no reaction to environmental stimuli                                                   | eyes closed; lateral position; shallow breathing; convulsions; animal cold |
