# Supplementary material for: Fracture Healing in Elderly Mice and the Effect of an Additional Severe Blood Loss: A Radiographic and Biomechanical Murine Study
Source: MDPI journal article supplement (doi:10.3390/bioengineering10010070), 2023-01-05
Supplement: s1 [file s1]

**Supplementary Table S2.** Lameness score. With this score, the load on the fractured leg was checked regularly.

| Lameness Score | Quality             | Characteristics                                                             |
|----------------|---------------------|-----------------------------------------------------------------------------|
| A              | full weight bearing | full weight bearing on fractured leg; no signs of lameness                  |
| B              | lameness            | not full weight bearing on fractured leg; intermittent relief or hesitation |
| C              | no weight bearing   | no weight bearing on fractured leg; complete, permanent relief              |
