# Supplementary material for: Fracture Healing in Elderly Mice and the Effect of an Additional Severe Blood Loss: A Radiographic and Biomechanical Murine Study
Source: MDPI journal article supplement (doi:10.3390/bioengineering10010070), 2023-01-05
Supplement: s1 [file s1]

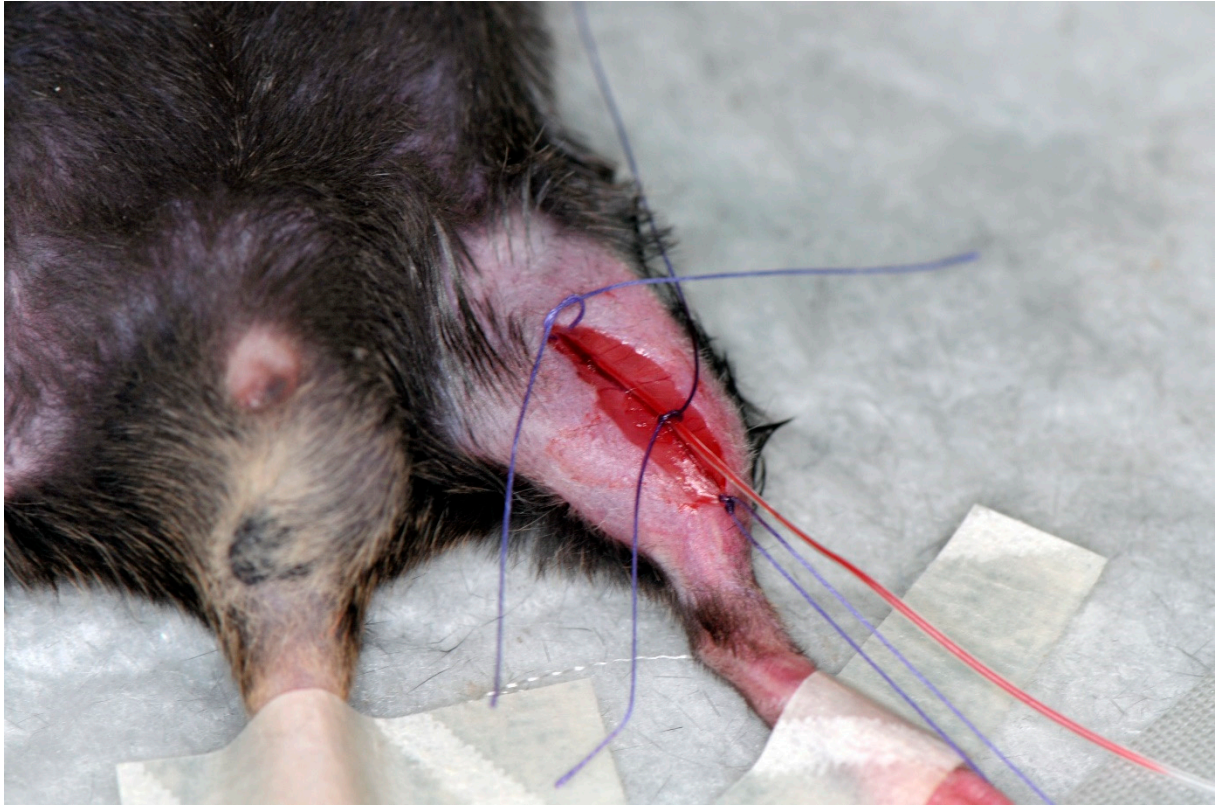

**Supplementary Figure S1.** Initiation of trauma hemorrhage. After insertion of a catheter into the left femoral artery, the mean arterial blood pressure was measured by a blood pressure analyzer, which was connected to a blood pressure measuring cell. Alternately, blood was collected via a syringe, after disconnecting the measuring devices, to maintain a mean arterial blood pressure of  $35 \pm 5$  mmHg over 90 minutes. Afterwards, four times of the amount of taken blood was reinfused by pre-heated body-temperature Ringer's solution via the catheter within 30 minutes.
