# Supplementary material for: Fracture Healing in Elderly Mice and the Effect of an Additional Severe Blood Loss: A Radiographic and Biomechanical Murine Study
Source: Bioengineering (Basel). 2023 Jan 5;10(1):70. doi: 10.3390/bioengineering10010070 (PMC9855159; doi:10.3390/bioengineering10010070)
Supplement: Supplementary file 1 [file bioengineering-10-00070-s001.zip]

Archive with 4 entries (4 files):
- bioengineering-2071941-supplementary Figure S1.pdf
- bioengineering-2071941-supplementary Table S1.pdf
- bioengineering-2071941-supplementary Table S2.pdf
- bioengineering-2071941-supplementary Table S3.pdf
